# Supplementary material for: Genome Variations Associated with Viral Susceptibility and Calcification in Emiliania huxleyi
Source: PLoS One. 2013 Nov 19;8(11):e80684. doi: 10.1371/journal.pone.0080684 (PMC3834299; doi:10.1371/journal.pone.0080684)
Supplement: Table S4 — Identified genes of E. huxleyi related to the production of coccoliths. Excel-file including array, gene and protein- ID, html-link to the genome website of the reference strain E. huxleyi CCMP1516, description and function of the identified genes of the 16 E. huxleyi strains. (XLS) [file pone.0080684.s005.xls]

## Sheet: pos
Array_ID	Genom_name	Protein ID	html-link	Description	nr ID	Pfam ID	Swissprot-ID (best BLAST hit)	Similarity to organism	Process	Note
Eh_2480	gm1.19600065	233731	233731 : Eh_24840	Putative 60 kDa inner membrane insertion protein		PF02096	Q07VS6	Shewanella frigidimarina NCIMB 400	folding,sorting and degradation	large intron	protein insertion into membrane
Eh_13879	e_gw1.68.11.1	67765	67765 : Eh_13879	Uncharacterized oxidoreductase		PF00248	A4TE41	Mycobacterium gilvum PYR-GCK	metabolism	This family includes a number of K+ ion channel beta chain regulatory domains - these are reported to have oxidoreductase activity	oxidation reduction	Aldo/keto reductase
Eh_20192	gm1.13000126	226193	226193 : Eh_20192	Arylsulfatase		PF00884	P15848	Homo sapiens	metabolism	calcium-binding
Eh_19644	fgenesh_newKGs_kg.124__11__EST_ALL.fasta.Contig11457	362061	362061 : Eh_19644	V-type proton ATPase 16 kDa proteolipid subunit		PF00137	Q43362	Pleurochrysis carterae	transport	H+-transporting ATPase; Vacuolar H+-ATPase, subunit C	ATP synthesis coupled proton transport	V-ATPases (V1V0-ATPases) are primarily found in eukaryotic vacuoles, catalysing ATP hydrolysis to transport solutes and lower pH in organelles. Proton-conducting pore forming subunit of the membrane integral V0 complex of vacuolar ATPase. V-ATPase is responsible for acidifying a variety of intracellular compartments in eukaryotic cells.
Eh_29674	estExtDG_fgenesh_newKGs_pm.C_3410001	424715	424715 : Eh_29674	Kelch-like protein		PF07707	Q9UH77	Homo sapiens	folding,sorting and degradation	protein binding	protein ubiquitination	two Pfam domains	PF00651
Eh_13638	estExtDG_fgeneshEH_pg.C_660026	465241	465241 : Eh_13638	Long-chain-fatty-acid--CoA ligase		PF00501	Q7ZYC4	Xenopus laevis	lipid metabolism	Long-chain-fatty-acid--CoA ligase, an enzyme that activates long-chain fatty acids for both the synthesis of cellular lipids and their degradation via beta-oxidation.
Eh_3632	fgeneshEH_pg.10__168	97544	97544 : Eh_3632	conserved hypothetical protein	CBK24732.2				unknown
Eh_10695	estExtDG_fgenesh_newKGs_kg.C_450081	436574	436574 : Eh_10695	Activator of 90 kDa heat shock protein ATPase homolog		PF09229	Q8BK64	Mus musculus	stress response	Co-chaperone that stimulates HSP90 ATPase activity. May affect a step in the endoplasmic reticulum to Golgi trafficking	two Pfam domains	PF08327	maybe involved in protein transport; response to stress
Eh_26617	estExtDG_fgeneshEH_pg.C_2400028	469014	469014 : Eh_26617	no significant hit					unknown
Eh_31930	fgenesh_newKGs_kg.456__15__2698244:1	370485	370485 : Eh_31930	no significant hit					unknown
Eh_16207	fgenesh_newKGs_kg.88__9__EST_ALL.fasta.Contig11457	359783	359783 : Eh_16207	V-type proton ATPase 16 kDa proteolipid subunit		PF00137	Q43362	Pleurochrysis carterae	transport	H+-transporting ATPase; Vacuolar H+-ATPase, V0, subunit c/c', transmembrane subunit		ATP synthesis coupled proton transport
